# Supplementary material for: X-linked intellectual disability gene CASK regulates postnatal brain growth in a non-cell autonomous manner
Source: PubMed Central journal article supplement (PMC4818453; doi:10.1186/s40478-016-0295-6), 2016-03-31
Supplement: 40478_2016_295_MOESM1_ESM.pdf [file 40478_2016_295_MOESM1_ESM.pdf]

## Supplementary Materials:

### **Fig. S1. Description of mouse lines used and effect of cre expression on floxed *CASK* gene**

(A) Table describing various mouse lines used in this study (B) Immunoblot from cortical cultures with indicated antibody; fl-*CASK* indicates *CASK* gene is floxed, and fl-*CASK*; Cre indicates the neuronal culture with floxed *CASK* gene transduced with Cre-recombinase expressing lentivirus. (C) Quantitation of *CASK* expression relative to liprin- $\alpha$ 3 expression. Data is plotted as mean  $\pm$  SEM, n = 3.

### **Fig. S2. *CASK* deletion from neurons and characterization of female heterozygous mice with neuron-specific *CASK* deletion**

(A) Representative brain images of Rosa-CAG-LSL-tdTomato mice with or without synapsin-Cre; note the ubiquitous expression of tdTomato with synapsin-Cre. (B) Sections from cerebellum and cortex showing Cre-mediated recombination in most neurons. (C) Representative images of brain from mice with indicated genotypes (the mice are shown in lower panel). (D) Shows that mice heterozygous for neuron-specific *CASK* deletion do not exhibit hind-limb clasping phenotype. (E) Comparison of brain weight of mice with indicated genotypes. Bar graphs are plotted as mean  $\pm$  SEM; n = 4. (F) Comparison of body weight of mice with indicated genotypes.

### **Fig. S3. *CASK* deletion from neurons does not affect cerebellum**

Representative images of H&E stained cerebella from mice of indicated genotype, demonstrating that *CASK* neuronal knockout mice have properly layered cerebella which are indistinguishable from the control mice.

### **Fig. S4. Generation of *CASK*<sup>(+/-)</sup> heterozygous mutant mice**

Schematic diagram of crosses for generating founder mice for the  $CASK^{+/-}$  colony. Female mice with  $CASK$  deleted in ova were crossed with the wild-type C57Bl6 males to generate  $CASK^{+/-}$  colony.

**Fig. S5. External granular layer of cerebellum is normal during development of  $CASK^{+/-}$  heterozygous mutant mice**

(A) Cerebella from the postnatal day 5 mouse pups were dissected and fixed in PFA. Parasagittal sections were stained with a green nucleic acid stain to reveal the external granular layer (EGL). (B) Quantitation of thickness of EGL is plotted as mean  $\pm$  SEM;  $n = 3$ .

**Fig. S6. Characterization of  $CASK^{+/-}$  heterozygous mutant mice**

(A) Representative images of brain sections depicting corpus callosum (CC) stained with hematoxylin; note that there is no apparent defect. (B) Representative images of neuromuscular junction stained with bungarotoxin-alexa488 from the extensor digitorum longus muscles. We did not find any obvious differences in the size, distribution, or number (quantitation not shown).

**Fig. S7. Schematic diagram depicting cell autonomous and non-cell autonomous reduction in cell numbers as possible cause of microcephaly**

(A) Schematic representation of normocephaly in wild-type mice. Green circles represent cells expressing  $CASK$  in a  $CASK^{+/+}$  brain. (B) Schematic representation of microcephaly in a non-cell autonomous manner in  $CASK^{+/-}$  brain. Green circles represent cells expressing  $CASK$  and red circles represent  $CASK$  deleted cells. A uniform reduction in both cell types will result in  $\sim$  50% reduction in total  $CASK$  level as measured from whole brain homogenates. (C) Schematic representation of microcephaly in a cell autonomous manner in  $CASK^{+/-}$  brain. Specific loss of only  $CASK$  deleted cells will result in no significant reduction in total  $CASK$  level in whole brain homogenates.

**Fig. S8. Table showing the nucleotide sequences of *CASK* shRNA used in the study**

**Fig. S9. *CASK* knockdown using shRNA 690 reduces cellular respiration and proliferation**

(A) Representative blot showing *CASK* knockdown in HEK 293 cells transfected with four individual *CASK* shRNAs. (B) Quantitation of bands seen in A, bar graphs are plotted as mean  $\pm$  SEM ; n = 3. (C) Mitochondrial respiration measurements in *CASK* knockdown HEK 293 cells and wild-type HEK 293 cells. Respiration rate is normalized to total protein levels and data is expressed as percent wild-type. Data is plotted as mean  $\pm$  SEM. (n = 4; \* indicates p < 0.05). (E) Hemocytometer cell count in *CASK* knockdown HEK 293 cells (shRNA 690) compared to the wild-type control. Data plotted as mean  $\pm$  SEM. (N = 4; \* indicates p < 0.05).

**Movie S1:** Demonstrates the movement and interaction of *CASK* neuronal knockout mice and wild-type littermate. The smaller mouse is the mutant mouse.

**Movie S2:** Demonstrates recurrent severe seizures in neuronal *CASK* knockout mice at 21 days after birth.

**A**

| Mouse line            | Original reference      | Recombination observed in                                                                                  | Original source        |
|-----------------------|-------------------------|------------------------------------------------------------------------------------------------------------|------------------------|
| CASK <sup>flxed</sup> | Atasoy et. al. 2007     | NA                                                                                                         | The Jackson Laboratory |
| LSLtdTomato           | Madisen et. al. 2010    | NA                                                                                                         | The Jackson Laboratory |
| ZP3-cre               | Lewandoski et. al. 1997 | Oocytes                                                                                                    | The Jackson Laboratory |
| Synapsin-cre          | Zhu et. al. 2001        | Post mitotic neurons, recombination begins as early as E12.5.                                              | The Jackson Laboratory |
| Math5-cre             | Yang et. al. 2003       | In many types of postmitotic neurons including granule cells of cerebellum. Recombination begins at E11.5. | The Jackson Laboratory |
| PCP2-cre              | Barski et. al. 2000     | Purkinje cells in cerebellum, recombination first observed at postnatal day 6.                             | The Jackson Laboratory |

**B**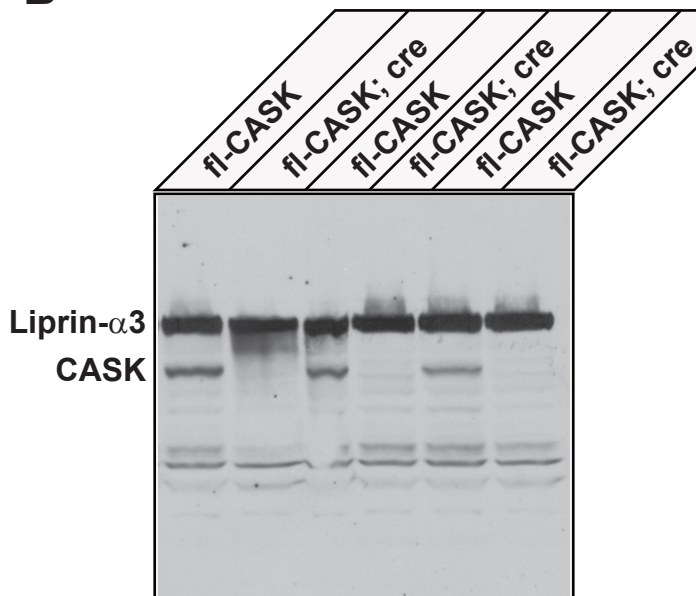**C**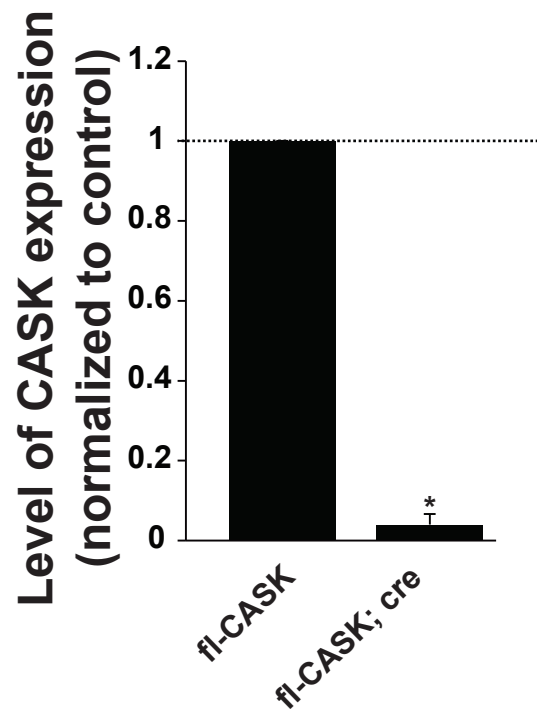**Figure S1**

**A** Rosa-CAG-LSL-tdTomato  
no cre (Synapsin)Syn-cre

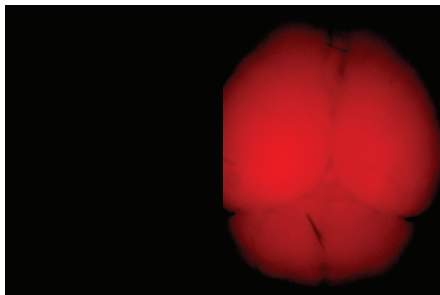

**B** Cerebellum Cortex

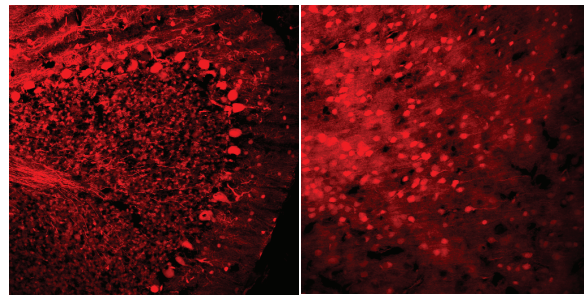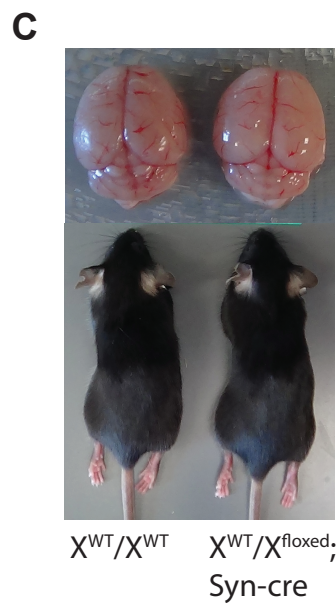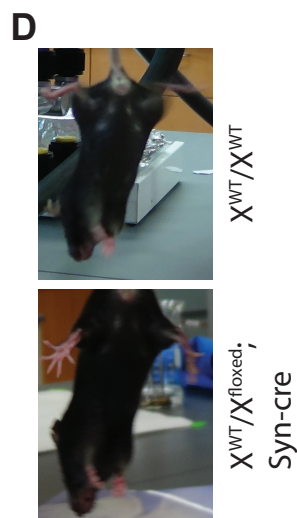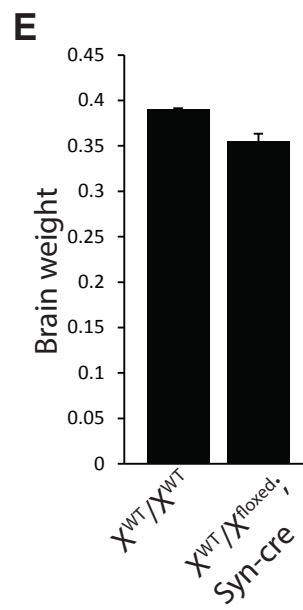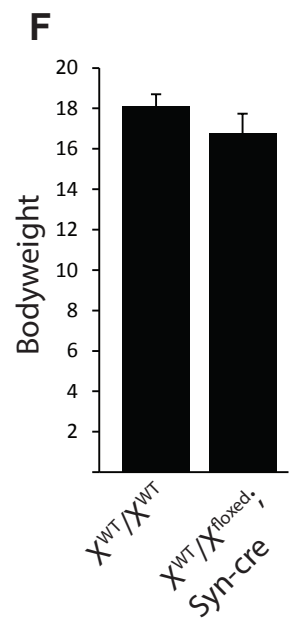

**Figure S2**

**X<sup>WT</sup>/Y**

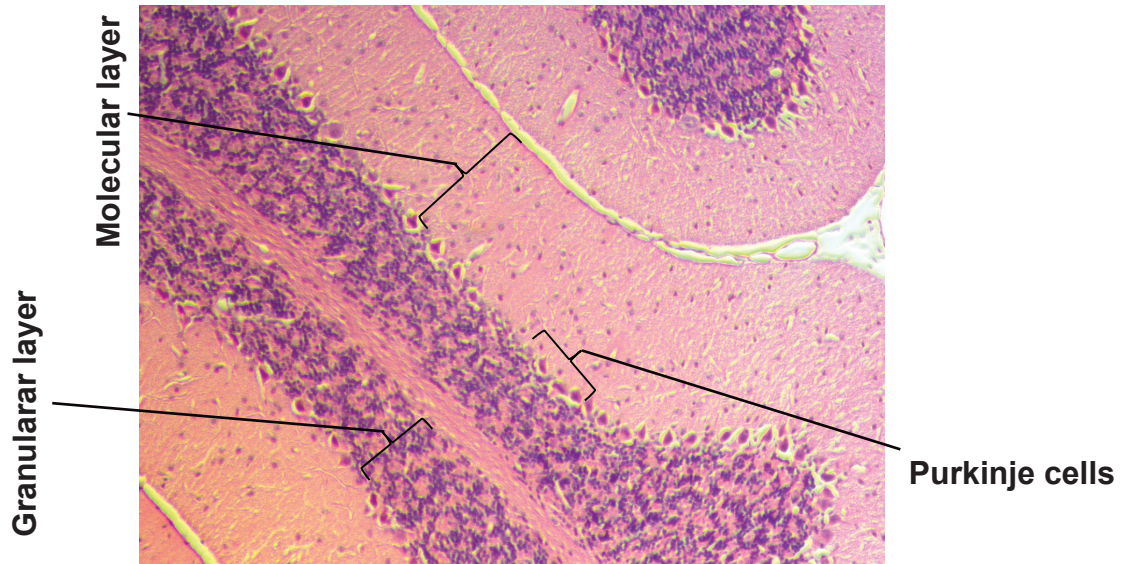

**X<sup>ficASK</sup>/Y**

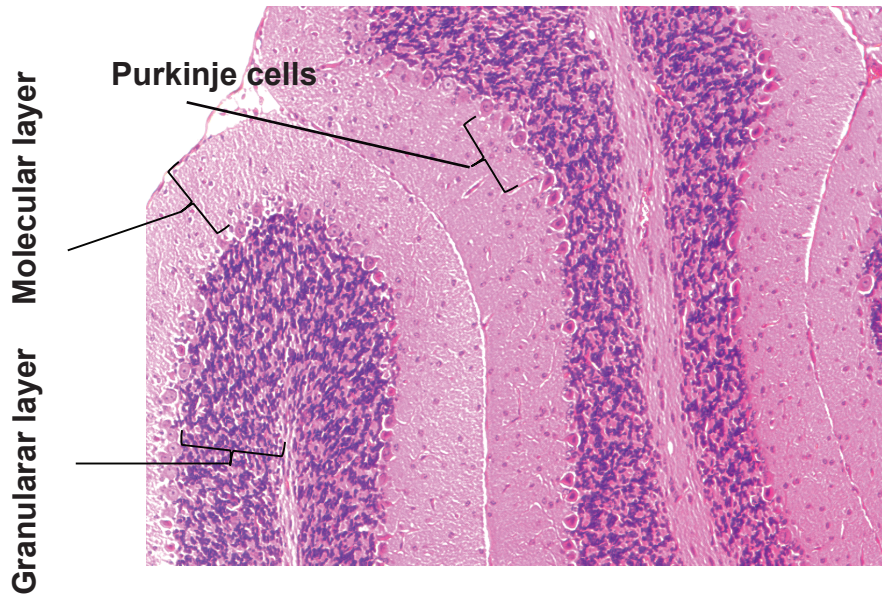

**X<sup>ficASK</sup>/Y; Synapsin-cre**

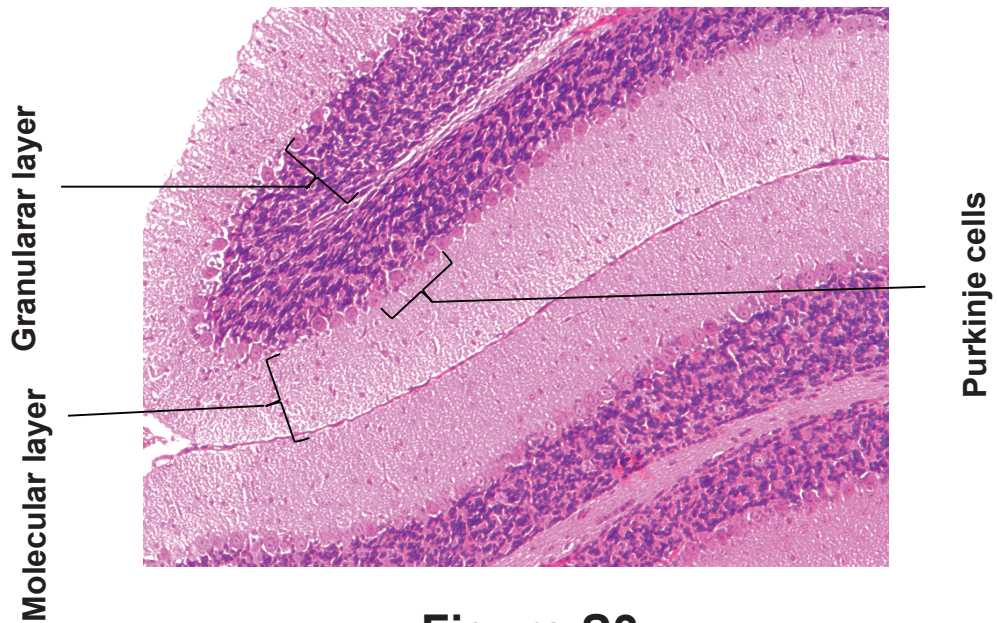

**Figure S3**

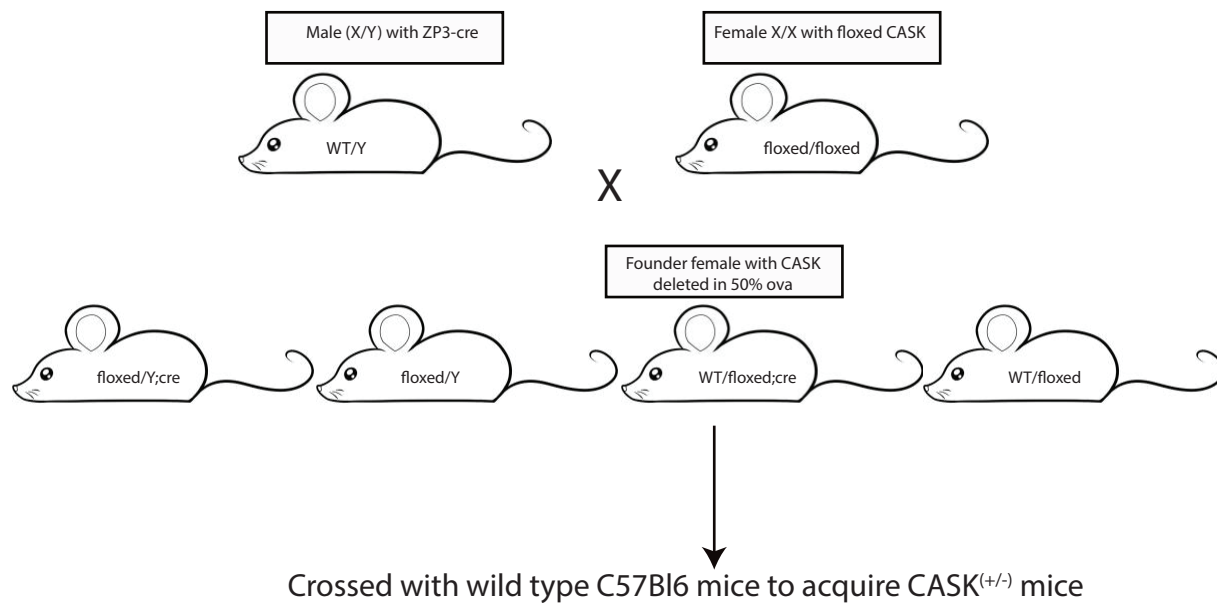

**Figure S4**

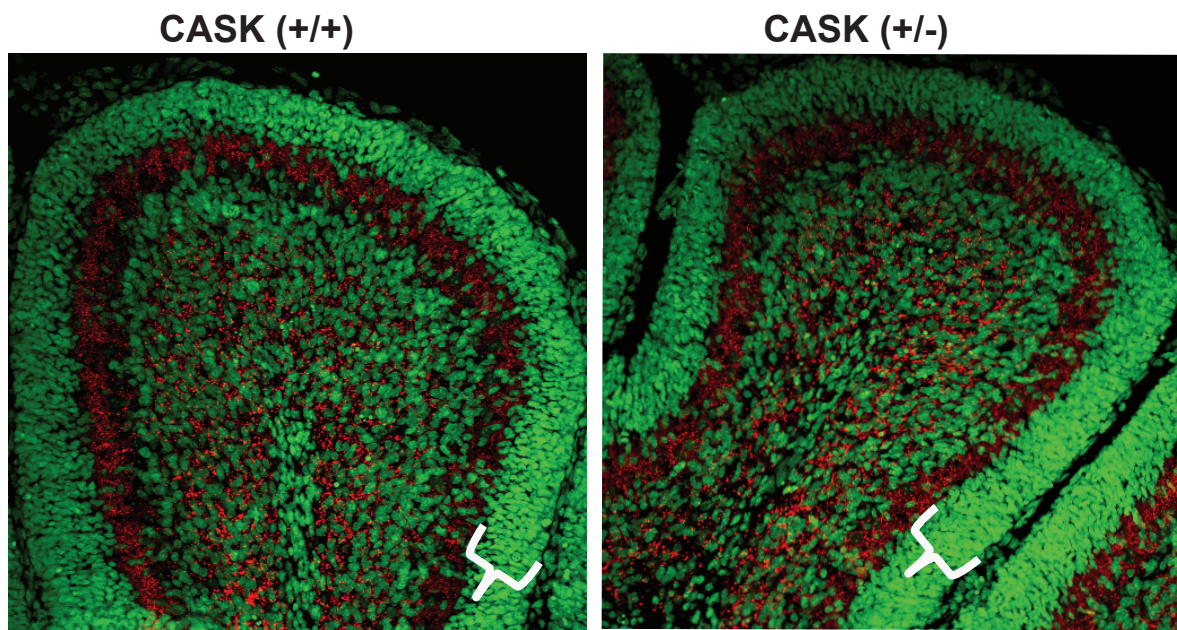

Postnatal day 5 cerebellum sections

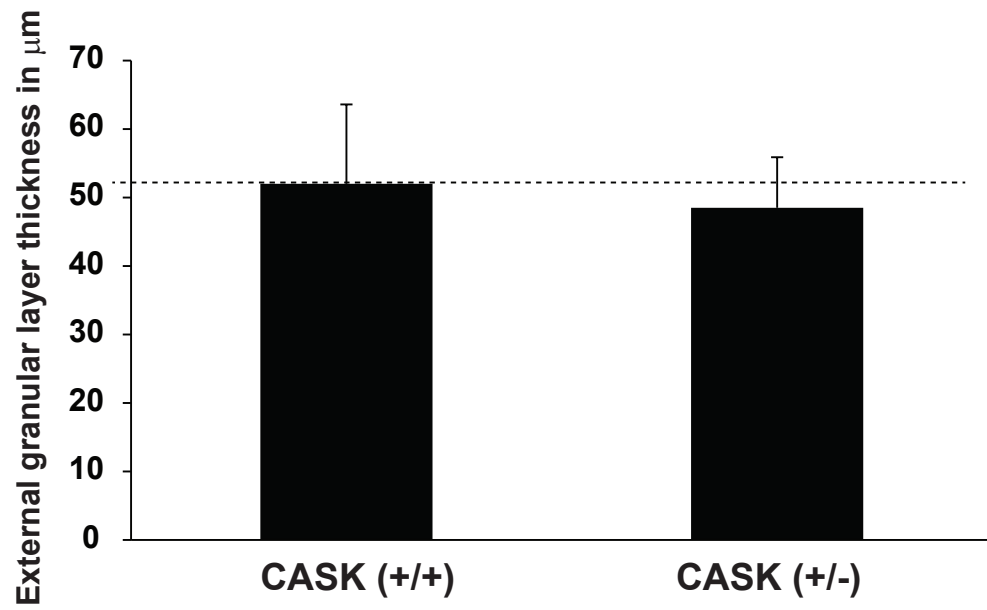

Figure S5



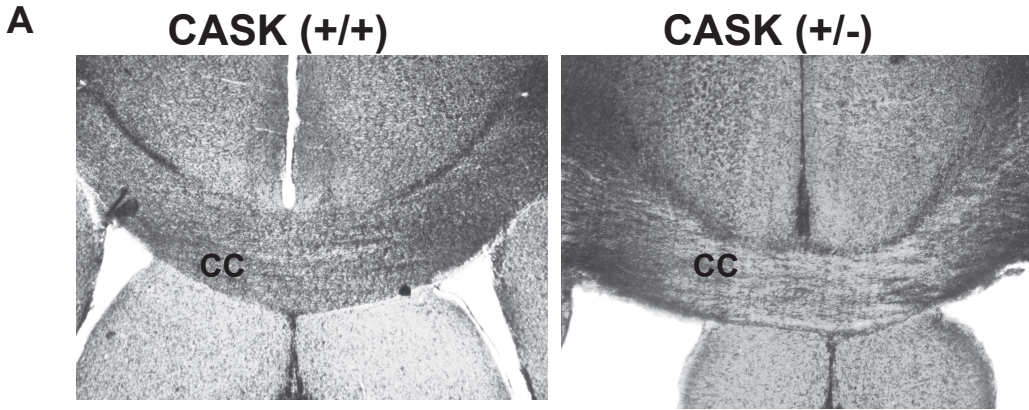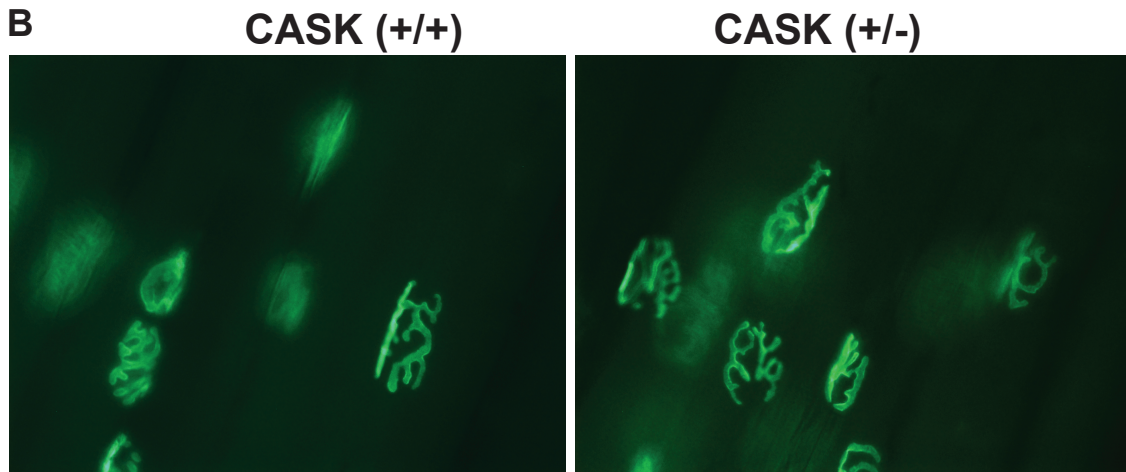

**Figure S6**

**A**

**CASK is an X-linked gene subject to random inactivation in each cell.**

Normocephaly (CASK +/+)

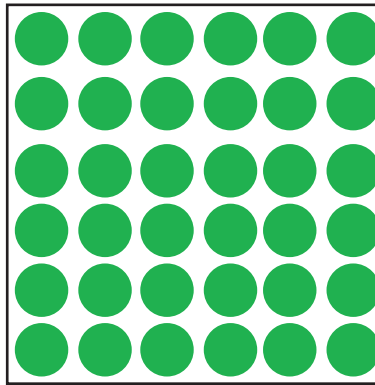

**B**

Microcephaly (CASK +/-)

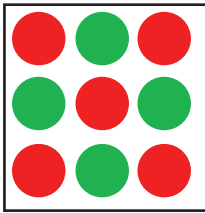

wildtype  
mutant

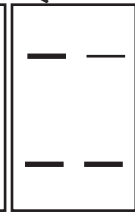

CASK

Tubulin

cell non-autonomous function of CASK leading to reduction in both CASK (+) and CASK (-) cells

**C**

Microcephaly (CASK +/-)

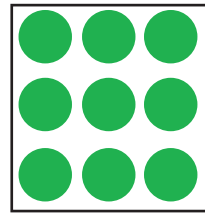

wildtype  
mutant

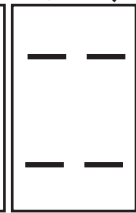

CASK

Tubulin

cell-autonomous function of CASK leading to reduction in only CASK (-) cells

**Figure S7**

| shRNA | Mature antisense      |
|-------|-----------------------|
| Sh690 | TGCTCCCAGTTATGCTCAGAT |
| Sh691 | AATGCCAGCTTCTTTACAGGG |
| Sh692 | TTTGCATCGTTATTCTCAGGG |
| Sh693 | TTTGGTTGGGTAGTTGATGGC |
| Sh694 | AATACGCTTTAGTTCCTTTGC |

**Figure S8**

**A**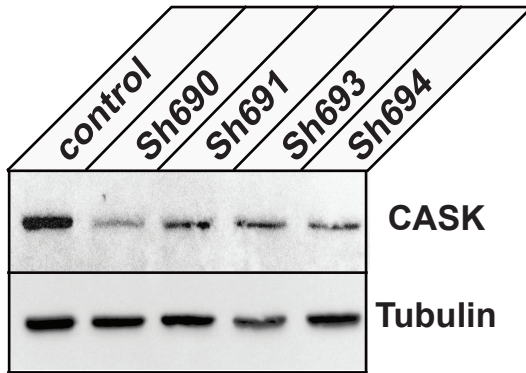**B**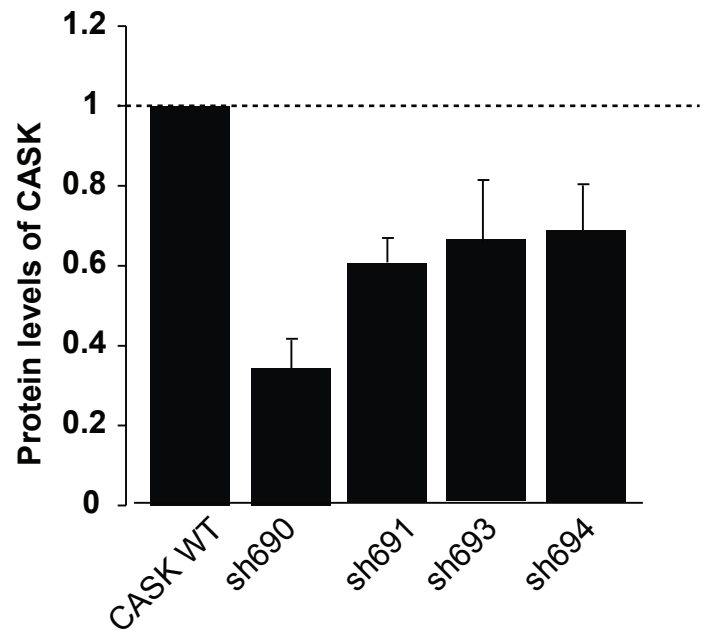**C**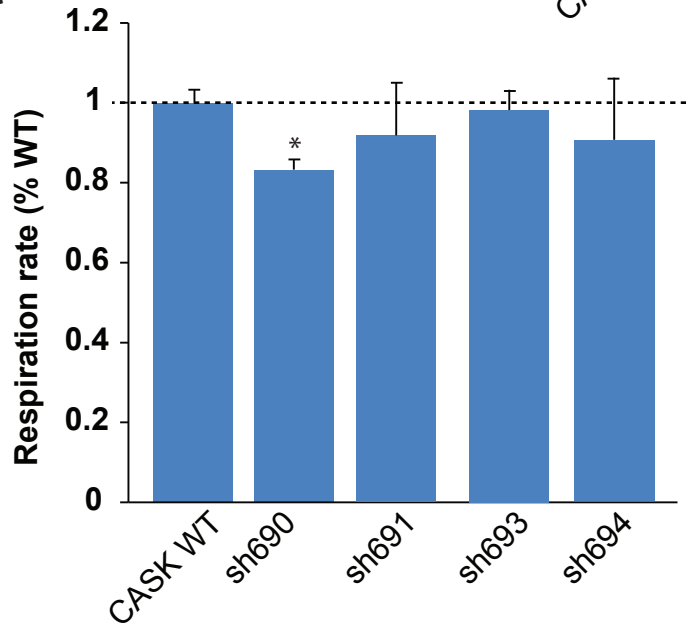**D**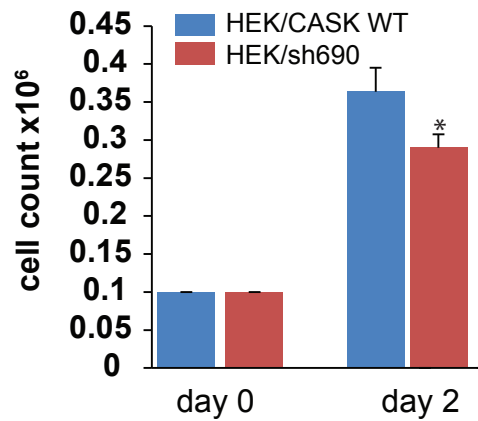**Figure S9**
